# Supplementary material for: Non-covalent interactions of a drug molecule encapsulated in a hybrid silica gel
Source: Royal Society of Chemistry journal article supplement (doi:10.1039/b711105c), 2007-01-01
Supplement: b711105c.pdf [file b711105c.pdf]

## Non-Covalent Interactions of a Drug Molecule Encapsulated in a Hybrid Silica Gel

Geo Paul,<sup>a</sup> Stefan Steuernagel<sup>b</sup> and Hubert Koller<sup>\*a</sup>

### Supplementary information

**Table 1.** Relative molar ratios, pH and stirring time ( $t_s$ ) for hybrid gel formulations

| <i>Gel</i>           | <i>TEOS</i> | <i>MTS</i>  | <i>H<sub>2</sub>O</i> | <i>Ethanol</i> | <i>HCl</i>    | <i>PP</i>    | <i>t<sub>s</sub> (h)/pH</i> |
|----------------------|-------------|-------------|-----------------------|----------------|---------------|--------------|-----------------------------|
| <i>TEOS:MTS(1:1)</i> | <i>1</i>    | <i>1.00</i> | <i>9.79</i>           | <i>3.90</i>    | <i>0.0039</i> | <i>0.058</i> | <i>24 / 2.2</i>             |
| <i>TEOS:MTS(3:1)</i> | <i>1</i>    | <i>0.33</i> | <i>6.53</i>           | <i>2.60</i>    | <i>0.0026</i> | <i>0.039</i> | <i>24 / 2.2</i>             |
| <i>TEOS:MTS(5:1)</i> | <i>1</i>    | <i>0.20</i> | <i>5.88</i>           | <i>2.34</i>    | <i>0.0023</i> | <i>0.035</i> | <i>24 / 2.2</i>             |

**Table 2:** 2D  $^{29}\text{Si}$ - $^1\text{H}$  FSLG HETCOR and  $^{13}\text{C}$ - $^1\text{H}$  FSLG HETCOR NMR experimental parameters.

|                                                 | $^{29}\text{Si}$ - $^1\text{H}$ HETCOR | $^{13}\text{C}$ - $^1\text{H}$ HETCOR |
|-------------------------------------------------|----------------------------------------|---------------------------------------|
| Number of $t_1$ increments                      | 80                                     | 76                                    |
| Relaxation delay /s                             | 2                                      | 2                                     |
| Number of scans                                 | 72                                     | 400                                   |
| MAS rate /kHz                                   | 12.5                                   | 12.5                                  |
| $^1\text{H}$ RF field /kHz                      | 104                                    | 104                                   |
| $^1\text{H}$ LG offset frequency /kHz           | +1.0                                   | +1.0                                  |
| FSLG decoupling power /kHz                      | 127                                    | 127                                   |
| Positive offset frequency (+ $\Delta LG$ ) /kHz | +74.680                                | +74.680                               |
| Negative offset frequency (- $\Delta LG$ ) /kHz | -72.680                                | -72.680                               |
| CP Contact time /ms                             | 2.0                                    | 1.0                                   |

In theory, under FSLG decoupling, the proton chemical shift is scaled by  $1/\sqrt{3}$  (0.577) and the proton chemical shift scale has been corrected for this scaling in all of the 2D spectra. The  $^1\text{H}$  chemical shift scale and the scaling factors were determined by comparing the 1D  $^1\text{H}$  spectra recorded under fast MAS. The scaling factors obtained for all the 2D spectra were well within the range of the theoretical value.  $^{13}\text{C}$  and  $^{29}\text{Si}$  chemical shifts are reported using the  $\delta$  scale and are externally referenced to adamantane and  $\text{Q}^8\text{M}^8$ , respectively. In addition,  $^{13}\text{C}\{^1\text{H}\}$  and  $^{29}\text{Si}\{^1\text{H}\}$  CPMAS experiments were performed with a CP contact time of 2.0 and 7.0 ms, respectively.

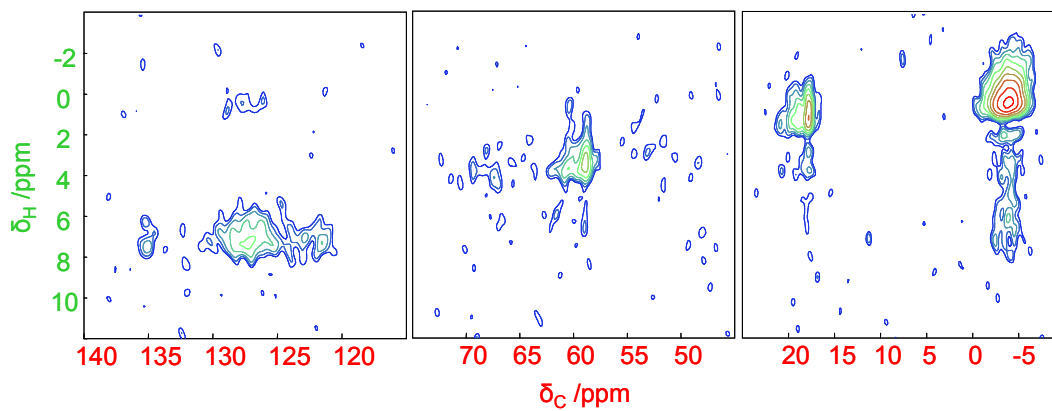

**Fig. S1:** The 2D  $^{13}\text{C}$ - $^1\text{H}$  FSLG HETCOR NMR spectra of hybrid gel (TEOS:MTS 3:1) at MAS of 12.5 kHz and a contact time of 0.8 ms.
